# Supplementary material for: Thyroid Dysfunction under Amiodarone in Patients with and without Congenital Heart Disease: Results of a Nationwide Analysis
Source: MDPI journal article supplement (doi:10.3390/jcm11072027), 2022-04-05
Supplement: s1 [file s1]

## Supplementary Materials:

**Table S1:** ICD-10-GM Codes/ OPS diagnosis and procedure codes/ATC codes relevant for analysis.

|                                                           |                                |
|-----------------------------------------------------------|--------------------------------|
| <b>Antiarrhythmic drugs</b>                               |                                |
| Class Ia                                                  | ATC: C01BA                     |
| Class Ib                                                  | ATC: C01BB                     |
| Class Ic                                                  | ATC: C01BC                     |
| Class III excluding amiodarone                            | ATC: C01BCD excluding C01BD01  |
| Amiodarone                                                | ATC: C01BD01                   |
| <b>Arrhythmia</b>                                         |                                |
| Atrial re-entrant tachycardia                             | ICD-10-GM: I47.1               |
| Atrial fibrillation                                       | ICD-10-GM: I48.0 - I48.2       |
| Atrial flutter                                            | ICD-10-GM: I48.3, I48.4        |
| Ventricular re-entrant tachycardia                        | ICD-10-GM: I47.0               |
| Ventricular tachycardia (other)                           | ICD-10-GM: I47.2               |
| Ventricular extrasystole                                  | ICD-10-GM: I49.3               |
| Ventricular flutter/ fibrillation                         | ICD-10-GM: I49.0               |
| Cardiac arrest (not specified further)                    | ICD-10-GM: I46.1, I46.1, I46.9 |
| <b>Baseline characteristics</b>                           |                                |
| Left heart failure                                        | ICD-10-GM: I50.1               |
| Right heart failure                                       | ICD-10-GM: I50.0               |
| Implantation of a pacemaker                               | OPS: 5-377.0- 5-377.4          |
| Implantation of an implantable cardioverter defibrillator | OPS: 5-377.5, 5-377.7          |
| Obesity                                                   | ICD-10-GM: E66                 |
| Smoking                                                   | ICD-10-GM: F17                 |
| Alcohol abuse                                             | ICD-10-GM: F10                 |
| Chronic kidney disease                                    | ICD-10-GM: N18.4, N18.5        |
| Liver dysfunction                                         | ICD-10-GM: K72.1, K72.7        |
| <b>Heart failure drug therapy</b>                         |                                |
| ACE-Inhibitors/ Angiotensin II receptor blockers          | ATC: C09                       |
| Diuretics                                                 | ATC: C03                       |
| Betablockers excluding sotalol                            | ATC: C07A excluding C07AA07    |
| Cardiac glycosides                                        | ATC: C01AA                     |
| Calcium channel blockers                                  | ATC: C08                       |
| <b>Thyroid dysfunction</b>                                |                                |
| Hyperthyroidism                                           | ICD-10-GM: E05                 |
| Hypothyroidism                                            | ICD-10-GM: E03                 |
| Thyroiditis                                               | ICD-10-GM: E06                 |
| Thyroid radiotherapy                                      | OPS: 8- 53                     |
| Thyroid surgery                                           | OPS: 5- 06                     |
| <b>Drug therapy/catheter ablation</b>                     |                                |
| Catheter ablation                                         | OPS: 1-26                      |
| Levothyroxine                                             | ATC: H03AA01                   |
| Thiamazole                                                | ATC: H03BB02                   |
| Propylthiouracil                                          | ATC: H03BA02                   |
| Sodiumperchlorate                                         | ATC: H03BC02                   |

**Table S2:** ICD-10 GM-Codes used for identification and grouping of patients with congenital heart disease (CHD).

|                                                                                                           |                                                                                                                            |
|-----------------------------------------------------------------------------------------------------------|----------------------------------------------------------------------------------------------------------------------------|
| <b>Simple CHD</b>                                                                                         |                                                                                                                            |
| Isolated ventricular septal defect                                                                        | Q21.0                                                                                                                      |
| Persistent arterial duct                                                                                  | Q25.0                                                                                                                      |
| Isolated congenital valve disease                                                                         | Q23.0, Q23.1, Q22.4, Q22.8, Q22.9, Q23.2, Q23.3, Q22.1, Q22.2, Q22.3                                                       |
| Other congenital malformation of the great arteries                                                       | Q25.8, Q25.9                                                                                                               |
| <b>Moderate complexity CHD</b>                                                                            |                                                                                                                            |
| Tetralogy of Fallot                                                                                       | Q21.3, Q21.80, (Q22.0 and Q21.0)                                                                                           |
| Ebstein's anomaly                                                                                         | Q22.5                                                                                                                      |
| Aortic isthmus stenosis, interrupted aortic arch                                                          | Q25.1, Q25.2                                                                                                               |
| Atrioventricular septal defect                                                                            | Q21.2                                                                                                                      |
| Partial anomalous pulmonary venous connection                                                             | Q26.3, Q26.4                                                                                                               |
| <b>Severely complex CHD</b>                                                                               |                                                                                                                            |
| Univentricular heart                                                                                      | Q20.1, Q20.2, Q20.4, Q22.6, Q23.4, (Q22.0 without Q21.0) I27.8 and at least one further Q-Code with the exception of Q21.1 |
| Eisenmenger's syndrome                                                                                    | or Q21.88 and at least one further Q-Code with the exception of Q21.1                                                      |
| Transposition of the great arteries (TGA)                                                                 | Q20.3, Q20.5                                                                                                               |
| Other complex heart malformation, e.g. total anomalous pulmonary venous connection, common arterial trunk | Q20.0, Q26.2                                                                                                               |

**Figure S1:** Study design.

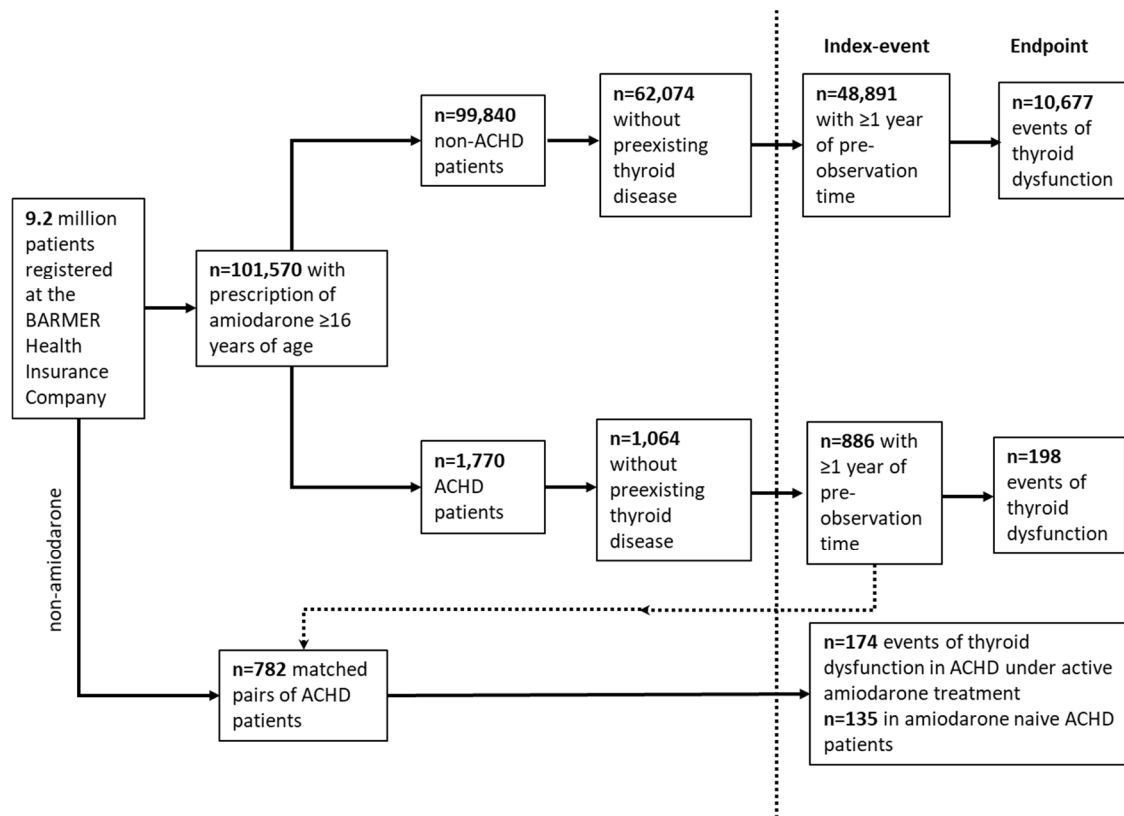

**Table S3:** Risk factors for occurrence of **hyperthyroidism** after amiodarone intake in **all patients**; results of the multivariable Cox regression analysis.

\*active amiodarone intake defined as prescription of amiodarone within 90 days before and after analyzation time. To avoid the problem of non-proportional hazards, a stepwise analysis showing yearly intervals was used, thus allowing the corresponding coefficient to be time-varying.

| Variable                                   | Hazard ratio (95% CI) | p-value |
|--------------------------------------------|-----------------------|---------|
| Active amiodarone intake (year 1)*         | 1.45 (1.23-1.71)      | <0.001  |
| Active amiodarone intake (year 2)*         | 1.40 (1.23-1.59)      | <0.001  |
| Active amiodarone intake (year 3)*         | 2.70 (2.37-3.07)      | <0.001  |
| Active amiodarone intake (year $\geq 4$ )* | 3.33 (2.99-3.70)      | <0.001  |
| Age /10 years                              | 0.89 (0.86-0.91)      | <0.001  |
| Female gender                              | 1.13 (1.06-1.19)      | <0.001  |
| Congenital heart disease                   | 0.95 (0.78-1.15)      | 0.60    |
| Pacemaker therapy                          | 1.06 (0.96-1.17)      | 0.27    |
| Implantable cardioverter defibrillator     | 1.15 (1.05-1.26)      | 0.003   |
| Chronic kidney disease                     | 0.90 (0.75-1.09)      | 0.28    |
| Liver dysfunction                          | 0.83 (0.26-2.61)      | 0.75    |
| Alcohol abuse                              | 0.96 (0.84-1.08)      | 0.48    |
| Smoking                                    | 1.13 (1.04-1.22)      | 0.004   |
| Obesity                                    | 0.88 (0.83-0.93)      | <0.001  |

**Table S4:** Risk factors for occurrence of **hyperthyroidism** after amiodarone intake in adults with **congenital heart disease only** (CHD); results of the multivariable Cox regression analysis.  
\*active amiodarone intake defined as prescription of amiodarone within 90 days before and after analyzation time. To avoid the problem of non-proportional hazards, a stepwise analysis showing yearly intervals was used, thus allowing the corresponding coefficient to be time-varying.

| Variable                               | Hazard ratio (95% CI) | <i>p</i> -value  |
|----------------------------------------|-----------------------|------------------|
| Active amiodarone intake (year 1)*     | 1.01 (0.33-3.10)      | 0.98             |
| Active amiodarone intake (year 2)*     | 2.09 (1.00-4.40)      | 0.05             |
| Active amiodarone intake (year 3)*     | 4.21 (1.61-10.99)     | <b>0.003</b>     |
| Active amiodarone intake (year ≥4)*    | 4.12 (2.02-8.40)      | <b>&lt;0.001</b> |
| Age /10 years                          | 0.93 (0.82-1.07)      | 0.32             |
| Female gender                          | 1.36 (0.90-2.05)      | 0.15             |
| Medium complexity CHD vs. simple       | 1.06 (0.67-1.68)      | 0.81             |
| High complexity CHD vs. simple         | 1.33 (0.74-2.39)      | 0.33             |
| Pacemaker therapy                      | 1.39 (0.77-2.49)      | 0.27             |
| Implantable cardioverter defibrillator | 1.32 (0.72-2.41)      | 0.37             |
| Alcohol abuse                          | 0.28 (0.04-2.16)      | 0.22             |
| Smoking                                | 0.93 (0.48-1.79)      | 0.82             |
| Obesity                                | 0.79 (0.49-1.27)      | 0.33             |

**Table S5:** Risk factors for occurrence of hypothyroidism after amiodarone intake in all patients; results of the multivariable Cox regression analysis.

\*active amiodarone intake defined as prescription of amiodarone within 90 days before and after analyzation time. To avoid the problem of non-proportional hazards, a stepwise analysis showing yearly intervals was used, thus allowing the corresponding coefficient to be time-varying.

| <b>Variable</b>                            | <b>Hazard ratio (95% CI)</b> | <b>p-value</b> |
|--------------------------------------------|------------------------------|----------------|
| Active amiodarone intake (year 1)*         | 2.44 (2.05-2.90)             | <0.001         |
| Active amiodarone intake (year 2)*         | 2.31 (2.02-2.64)             | <0.001         |
| Active amiodarone intake (year 3)*         | 2.09 (1.82-2.40)             | <0.001         |
| Active amiodarone intake (year $\geq 4$ )* | 2.87 (2.66-3.10)             | <0.001         |
| Age /10 years                              | 1.04 (1.01-1.07)             | 0.005          |
| Female gender                              | 1.63 (1.56-1.72)             | <0.001         |
| Congenital heart disease                   | 1.08 (0.91-1.28)             | 0.36           |
| Pacemaker therapy                          | 1.12 (1.03-1.22)             | 0.005          |
| Implantable cardioverter defibrillator     | 1.38 (1.27-1.49)             | <0.001         |
| Chronic kidney disease                     | 1.89 (1.68-2.12)             | <0.001         |
| Liver dysfunction                          | 0.57 (0.19-1.75)             | 0.33           |
| Alcohol abuse                              | 1.45 (1.31-1.60)             | <0.001         |
| Smoking                                    | 1.11 (1.03-1.20)             | 0.005          |
| Obesity                                    | 1.11 (1.06-1.16)             | <0.001         |

**Table S6:** Risk factors for occurrence of **hypothyroidism** after amiodarone intake in **adults with congenital heart disease only** (CHD); results of the multivariable Cox regression analysis.

\*active amiodarone intake defined as prescription of amiodarone within 90 days before and after analyzation time. To avoid the problem of non-proportional hazards, a stepwise analysis showing yearly intervals was used, thus allowing the corresponding coefficient to be time-varying.

| Variable                               | Hazard ratio (95% CI) | <i>p</i> -value |
|----------------------------------------|-----------------------|-----------------|
| Active amiodarone intake (year 1)*     | 3.37 (0.97-11.74)     | 0.06            |
| Active amiodarone intake (year 2)*     | 2.36 (1.12-5.00)      | <b>0.02</b>     |
| Active amiodarone intake (year 3)*     | 2.47 (0.85-7.21)      | 0.10            |
| Active amiodarone intake (year ≥4)*    | 2.39 (1.40-4.11)      | <b>0.002</b>    |
| Age/10 years                           | 0.87 (0.77-0.99)      | <b>0.03</b>     |
| Female gender                          | 1.79 (1.27-2.52)      | <b>0.001</b>    |
| Medium complexity CHD vs. simple       | 1.27 (0.86-1.89)      | 0.23            |
| High complexity CHD vs. simple         | 1.73 (1.11-2.70)      | <b>0.02</b>     |
| Pacemaker therapy                      | 1.27 (0.74-2.18)      | 0.39            |
| Implantable cardioverter defibrillator | 1.29 (0.71-2.33)      | 0.41            |
| Chronic kidney disease                 | 2.97 (1.16-7.59)      | <b>0.02</b>     |
| Alcohol abuse                          | 1.31 (0.54-3.18)      | 0.55            |
| Smoking                                | 1.41 (0.87-2.31)      | 0.17            |
| Obesity                                | 1.06 (0.73-1.54)      | 0.77            |

**Table S7:** Use of catheter ablation and antiarrhythmic drug treatment around the time of diagnosis of thyroid dysfunction in adults with congenital heart disease (ACHD) versus non-ACHD.

|                                                     | Non-ACHD, n=48,891          |                            | ACHD, n=886                 |                            |
|-----------------------------------------------------|-----------------------------|----------------------------|-----------------------------|----------------------------|
|                                                     | 6 months before<br>endpoint | 6 months after<br>endpoint | 6 months before<br>endpoint | 6 months after<br>endpoint |
| <b>Combined endpoint thyroid dysfunction, n (%)</b> | 10,677 (21.8)               |                            | 198 (22.3)                  |                            |
| Catheter ablation, n (%)                            | 858 (8.0)                   | 1,352 (12.7)               | 23 (11.6)                   | 31 (15.7)                  |
| Intake of antiarrhythmic drugs                      |                             |                            |                             |                            |
| Class Ia, n (%)                                     | 5 (0.0)                     | 4 (0.0)                    | 0 (0.0)                     | 0 (0.0)                    |
| Class Ib, n (%)                                     | 9 (0.1)                     | 6 (0.1)                    | 0 (0.0)                     | 0 (0.0)                    |
| Class Ic, n (%)                                     | 199 (1.9)                   | 221 (2.1)                  | 7 (3.5)                     | 8 (4.0)                    |
| Class III, n (%)                                    | 7,904 (74.0)                | 5,171 (48.4)               | 129 (65.2)                  | 80 (40.4)                  |
| Amiodarone only, n (%)                              | 7,842 (73.4)                | 5,022 (47.0)               | 128 (64.6)                  | 75 (37.9)                  |
| <b>Hyperthyroidism, n (%)</b>                       | 5,094 (10.4)                |                            | 103 (11.6)                  |                            |
| Catheter ablation, n (%)                            | 425 (8.3)                   | 714 (14.0)                 | 13 (12.6)                   | 17 (16.5)                  |
| Intake of antiarrhythmic drugs                      |                             |                            |                             |                            |
| Class Ia, n (%)                                     | 3 (0.1)                     | 3 (0.1)                    | 0 (0.0)                     | 0 (0.0)                    |
| Class Ib, n (%)                                     | 5 (0.1)                     | 5 (0.1)                    | 0 (0.0)                     | 0 (0.0)                    |
| Class Ic, n (%)                                     | 118 (2.3)                   | 149 (2.9)                  | 3 (2.9)                     | 6 (5.8)                    |
| Class III, n (%)                                    | 3,613 (70.9)                | 1,990 (39.1)               | 64 (62.1)                   | 32 (31.1)                  |
| Amiodarone only, n (%)                              | 3,574 (70.2)                | 1,882 (36.9)               | 64 (62.1)                   | 29 (28.2)                  |
| <b>Hypothyroidism, n (%)</b>                        | 7,079 (14.5)                |                            | 138 (15.6)                  |                            |
| Catheter ablation, n (%)                            | 587 (8.3)                   | 863 (12.2)                 | 16 (11.6)                   | 22 (15.9)                  |
| Intake of antiarrhythmic drugs                      |                             |                            |                             |                            |
| Class Ia, n (%)                                     | 2 (0.0)                     | 1 (0.0)                    | 0 (0.0)                     | 0 (0.0)                    |
| Class Ib, n (%)                                     | 7 (0.1)                     | 4 (0.1)                    | 0 (0.0)                     | 0 (0.0)                    |
| Class Ic, n (%)                                     | 117 (1.7)                   | 109 (1.5)                  | 3 (2.2)                     | 1 (0.7)                    |
| Class III, n (%)                                    | 4,978 (70.3)                | 3,628 (51.3)               | 82 (59.4)                   | 61 (44.2)                  |
| Amiodarone only, n (%)                              | 4,925 (69.6)                | 3,554 (50.2)               | 81 (58.7)                   | 59 (42.8)                  |
